# Supplementary material for: Direct chemical vapor deposition of graphene on plasma-etched quartz glass combined with Pt nanoparticles as an independent transparent electrode for non-enzymatic sensing of hydrogen peroxide
Source: Royal Society of Chemistry journal article supplement (doi:10.1039/d0ra01963a), 2020-01-01
Supplement: d0ra01963a1.pdf [file d0ra01963a1.pdf]

*Electronic Supplementary Material for*

**Direct Chemical Vapor Deposition Graphene on Plasma-etched Quartz Glass  
Combined with Pt Nanoparticles as an Independent Transparent Electrode for  
Non-enzymatic Sensing of Hydrogen Peroxide**

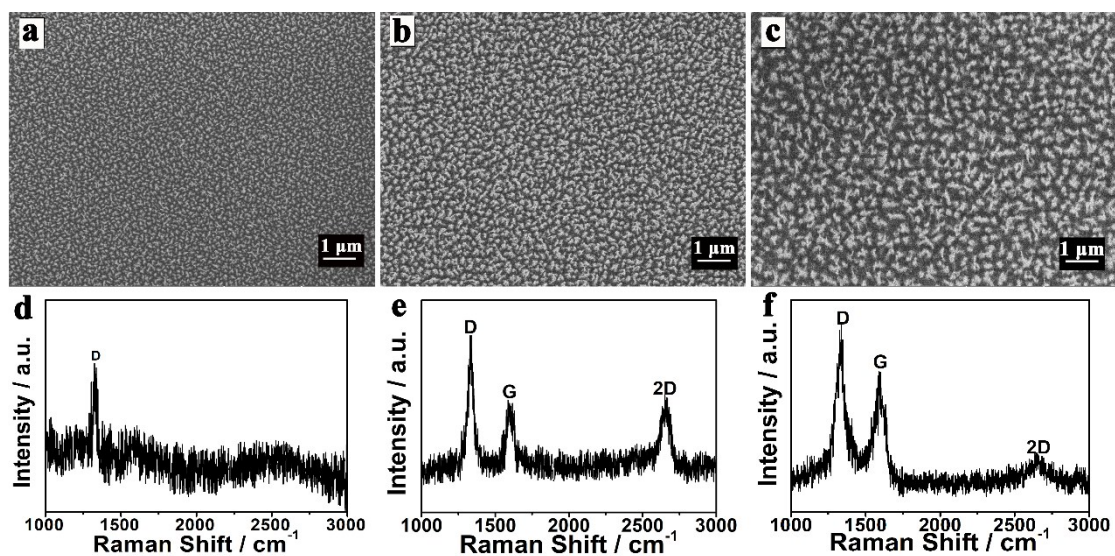

**Fig. S1** (a, b, c) SEM images and (d, e, f) Raman spectrum of graphene grown on etched quartz glass (eQG) for etching times of 5 min (a, d), 10 min (b, e) and 15 min (c, f).

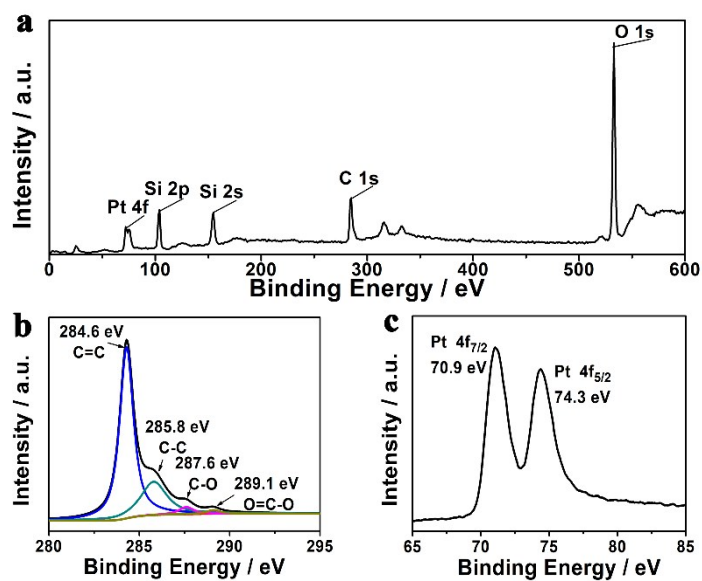

**Fig. S2** XPS (a) survey spectra, (b) C 1s spectra and (c) Pt 4f spectra of PtNPs/eQG.

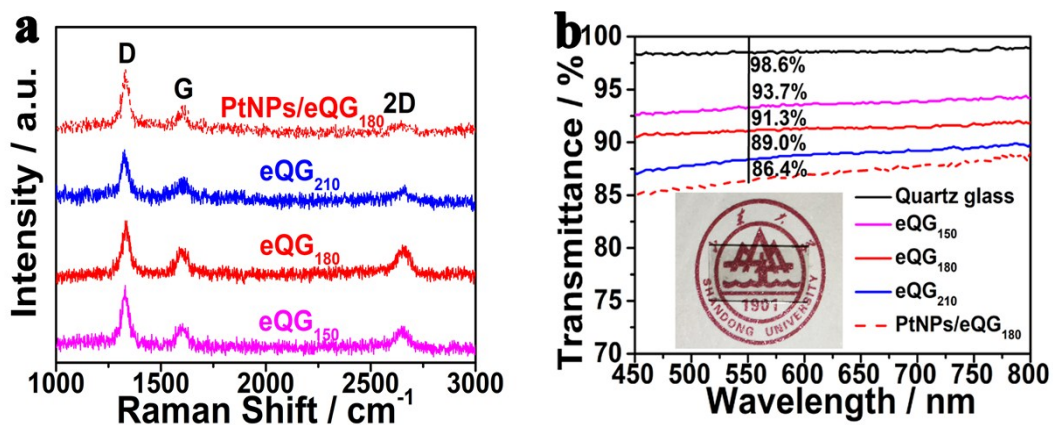

**Fig. S3** (a) Raman spectra and (b) UV-vis spectra of eQG<sub>150</sub>, eQG<sub>180</sub>, eQG<sub>210</sub> and PtNPs/eQG<sub>180</sub>. Inset b is the photo of PtNPs loaded on eQG<sub>180</sub> with good transmittance.

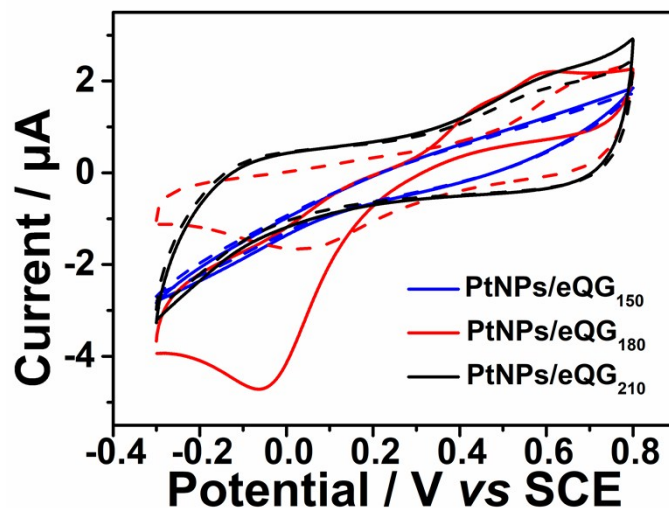

**Fig. S4** Cyclic voltammogram curves of PtNPs/eQG<sub>150</sub> (blue line), PtNPs/eQG<sub>180</sub> (red line) and PtNPs/eQG<sub>210</sub> (black line) in the presence (solid line) and the absence (dashed line) of 10  $\mu\text{M}$  H<sub>2</sub>O<sub>2</sub> with a scan rate of 50 mV/s.

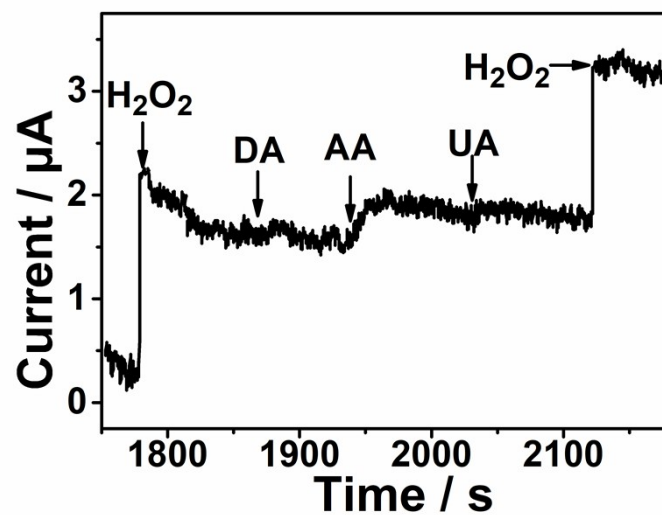

**Fig. S5** Amperometric *i-t* curve of PtNPs/eQG upon intermittently adding H<sub>2</sub>O<sub>2</sub> (0.05 mmol/L), dopamine (DA, 0.5 mmol/L), ascorbic acid (AA, 0.5 mmol/L) and uric acid (UA, 0.5 mmol/L) to phosphate buffer solution with a potential of 0.60 V.
